# Supplementary material
Source: PubMed Central journal article supplement (PMC4151735)
Supplement: 1408805111_pnas.201408805SI.pdf [file 1408805111_pnas.201408805SI.pdf]

# Supporting Information

Ishibashi et al. 10.1073/pnas.1408805111

## SI Materials and Methods

**Chronic Drug Treatment.** Sprague–Dawley rats (~3 wk old) were injected s.c. with PBS, nicotine (1 mg/kg), donepezil (2 mg/kg), galantamine (3 mg/kg), or pirenzepine (20 mg/kg) twice daily for at least 10 d and up to 15 d. RS86 (1–2 mg/kg) was administered i.p. to rats twice daily for at least 7 d and up to 15 d. When pirenzepine (20 mg/kg) was coadministered with nicotine (1 mg/kg) or donepezil (2 mg/kg), nicotine or donepezil was injected into a different site 10–15 min after injection of pirenzepine. Pirenzepine passes the blood–brain barrier, but only to a small extent (1). However, pirenzepine (20–75 mg/kg, i.p.) was shown to block the ameliorative effect of acetylcholinesterase inhibitors on spatial memory deficits (2). Thus, pirenzepine (20 mg/kg, i.p., twice daily for 10 d) was administered alone or together with nicotine (1 mg/kg, s.c., twice daily for 10 d) to rats. Donepezil at 2.5 mg/kg causes a significant increase in the levels of synaptic ACh in the hippocampus of rats (3). Donepezil is a more potent drug than galantamine in the inhibition of rat brain acetylcholinesterase after *in vivo* administration (4, 5). However, galantamine, but not donepezil, also acts as an allosteric potentiating ligand at nicotinic ACh receptors (5, 6). This modulation occurs only within a specific concentration range (0.02–2.0  $\mu$ M). Previous studies suggest that 0.1–1.0  $\mu$ M concentrations of brain galantamine are expected 2–3 h after s.c. injection of galantamine at 3.0 mg/kg (5). Thus, rats were injected with donepezil (2 mg/kg, s.c., twice daily for 10 d) or galantamine (3.0 mg/kg, s.c., twice daily for 10 d). RS86 was used as an m1 muscarinic receptor agonist (7, 8). Because i.p. administration of 1–1.5 mg/kg of RS86 twice daily for 7 d was shown to induce significant molecular and behavioral changes in rats (7, 8), we used the same drug regime to treat rats.

**Slice Preparation.** Ninety minutes or, in some experiments, ~16 h after the last injection, the animals were decapitated under anesthesia with urethane. These different procedures did not change outcomes. Transverse hippocampal slices (300  $\mu$ m) were then prepared using a vibrating blade microtome (VT1000S; Leica); maintained at 30–32 °C in artificial cerebrospinal fluid (ACSF) containing 124 mM NaCl, 5 mM KCl, 1.25 mM  $\text{NaH}_2\text{PO}_4$ , 2 mM  $\text{MgSO}_4$ , 2.5 mM  $\text{CaCl}_2$ , 22 mM  $\text{NaHCO}_3$ , and 10 mM glucose; and oxygenated with 95% (vol/vol)  $\text{O}_2$  and 5% (vol/vol)  $\text{CO}_2$ .

**Electrophysiological Recording.** Excitatory postsynaptic currents (EPSCs) were recorded using the whole-cell patch clamp technique as described previously (9). Slices were placed in a recording chamber (capacity of 0.3–0.4 mL), submerged, and continuously perfused at 1–2 mL/min with oxygenated ACSF at 30 °C. Neurons were visualized for whole-cell recording using a 40 $\times$  water-immersion objective and a differential interference

contrast system under IR light (Axioskop; Zeiss). Voltage-clamp recordings were then made from the somatic region of CA1 pyramidal cells at a holding potential of +40 mV in the presence of the GABA<sub>A</sub> receptor antagonist bicuculline (10  $\mu$ M), which blocks GABAergic synaptic transmission. The patch electrodes were pulled from borosilicate glass (World Precision Instrument) using a micropipette puller (P-97; Sutter Instrument). The patch pipettes (5–7 M $\Omega$ ) were filled with solution containing 117 mM Cs-methanesulfonate, 10 mM Hepes, 0.5 mM EGTA, 2.8 mM NaCl, 5 mM tetraethylammonium chloride, 5 mM QX-314, 2.5 mM Mg-ATP, and 0.3 mM Na-GTP, adjusted to pH 7.3 with CsOH. Series resistances were monitored throughout experiments by application of hyperpolarizing pulses through the patch pipette; if the series resistances changed more than 20%, the experiment was stopped and the data were eliminated. Afferent fibers (Schaffer collateral/commissural afferents) were stimulated once every 30 s (duration of 0.15–0.2 ms) using a bipolar electrode placed in the stratum radiatum. Stimulation intensity (<50  $\mu$ A for 50- $\mu$ s pulse) was adjusted to evoke EPSC amplitude in the range of 100–200 pA. EPSCs were amplified and filtered (2–5 kHz) using an Axopatch-1D amplifier (Axon Instruments), digitized at 10 kHz using Digidata 1200 (Axon Instruments), stored on a microcomputer, and analyzed using pCLAMP7 (Axon Instruments). NMDA receptor (NMDAR)/AMPA receptor (AMPA) ratios were calculated by measuring the average peak EPSC at +40 mV (EPSCs recorded over 5 min) before and after application of the NMDAR antagonist 2-amino-5-phosphopentanoate (AP5; 40  $\mu$ M). The NMDAR EPSC amplitude was obtained by digital subtraction of the AMPAR EPSC amplitude (peak current in the presence of AP5) from the initial EPSC. NMDAR-mediated responses were recorded from pyramidal cells voltage-clamped at –30 to –40 mV in the presence of a non-NMDAR antagonist, 6,7-dinitroquinoxaline-2,3-dione (20  $\mu$ M), and a GABA<sub>A</sub> receptor antagonist, bicuculline (10  $\mu$ M). Src (30 U/mL; Upstate) was directly applied into pyramidal cells by diffusional exchange through patch pipettes. Src was stored as 100 $\times$  single-use stocks and prepared immediately before use. To determine the change of the synaptic NMDAR EPSCs, mean amplitudes recorded 25–30 min after establishment of whole-cell configuration were calculated and expressed as a ratio of the mean amplitudes during first 5–10 min. If current responses did not stabilize within 10 min after achievement of whole-cell configuration, the experiments were stopped and the data were discarded. Focal application of NMDA (1 mM dissolved in ACSF) was performed in the presence of tetrodotoxin (1  $\mu$ M) by pressure ejection (6–10 ms, 15–20 psi) into the proximal region of the apical dendrites of pyramidal cells using a Picospritzer II (General Valve).

1. Jaup BH, Blomstrand C (1980) Cerebro-spinal fluid concentrations of pirenzepine after therapeutic dosage. *Scand J Gastroenterol Suppl* 66:35–37.
2. Murakami Y, Ikenoya M, Matsumoto K, Li H, Watanabe H (2000) Ameliorative effect of tacrine on spatial memory deficit in chronic two-vessel occluded rats is reversible and mediated by muscarinic M1 receptor stimulation. *Behav Brain Res* 109(1):83–90.
3. Kosasa T, Kuriya Y, Matsui K, Yamanishi Y (1999) Effect of donepezil hydrochloride (E2020) on basal concentration of extracellular acetylcholine in the hippocampus of rats. *Eur J Pharmacol* 380(2-3):101–107.
4. Barnes CA, et al. (2000) Chronic treatment of old rats with donepezil or galantamine: Effects on memory, hippocampal plasticity and nicotinic receptors. *Neuroscience* 99(1):17–23.
5. Sharp BM, Yatsula M, Fu Y (2004) Effects of galantamine, a nicotinic allosteric potentiating ligand, on nicotine-induced catecholamine release in hippocampus and nucleus accumbens of rats. *J Pharmacol Exp Ther* 309(3):1116–1123.

6. Maelicke A, Albuquerque EX (2000) Allosteric modulation of nicotinic acetylcholine receptors as a treatment strategy for Alzheimer's disease. *Eur J Pharmacol* 393(1-3): 165–170.
7. Gower AJ (1987) Effects of acetylcholine agonists and antagonists on yawning and analgesia in the rat. *Eur J Pharmacol* 139(1):79–89.
8. Seo H, Ferree AW, Isacson O (2002) Cortico-hippocampal APP and NGF levels are dynamically altered by cholinergic muscarinic antagonist or M1 agonist treatment in normal mice. *Eur J Neurosci* 15(3):498–506.
9. Yamazaki Y, Jia Y, Niu R, Sumikawa K (2006) Nicotine exposure *in vivo* induces long-lasting enhancement of NMDA receptor-mediated currents in the hippocampus. *Eur J Neurosci* 23(7):1819–1828.
